# Supplementary material for: Synthesis, structure, magnetic properties and EPR spectroscopy of a copper(ii) coordination polymer with a ditopic hydrazone ligand and acetate bridges
Source: Royal Society of Chemistry journal article supplement (doi:10.1039/c4dt03060e), 2014-11-24
Supplement: c4dt03060e1.pdf [file c4dt03060e1.pdf]

# Synthesis, structure, magnetic properties and EPR spectroscopy of a copper(II) coordination polymer with ditopic hydrazone ligand and acetate bridges

Rahman Bikas,<sup>a,b\*</sup> Pavlo Aleshkevych,<sup>c</sup> Hassan Hosseini-Monfared,<sup>a</sup> Joaquín Sanchiz,<sup>d</sup> Ritta Szymczak,<sup>c</sup> Tadeusz Lis<sup>b</sup>

<sup>a</sup> Department of Chemistry, Faculty of Science, University of Zanjan 45371-38791, Zanjan, Iran

<sup>b</sup> Faculty of Chemistry, University of Wrocław, Joliot-Curie 14, Wrocław 50-383, Poland

<sup>c</sup> Institute of Physics, Polish Academy of Sciences (PAN), Al. Lotników 32/46, PL-02-668 Warsaw, Poland

<sup>d</sup> Department of Chemistry, Faculty of Science, University of La Laguna, Tenerife 38206, Spain

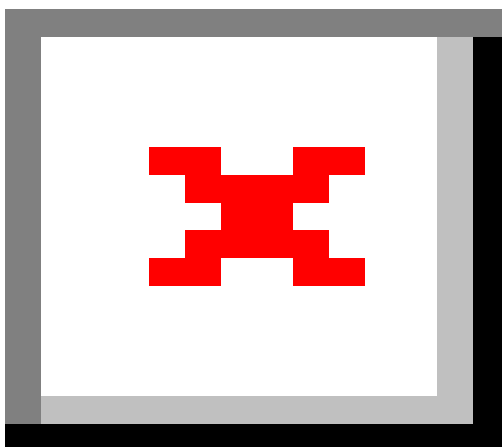

**Fig. S1.**  $\pi$ - $\pi$  (pink dashed line) and C-H $\cdots$ O (brown dashed line) interactions in crystal **1**

---

\* Corresponding author. Tel.: +98 241 5152576; Fax: +98 241 2283203. E-mail address: [bikas\\_r@yahoo.com](mailto:bikas_r@yahoo.com), [bikas@znu.ac.ir](mailto:bikas@znu.ac.ir) (R. Bikas).

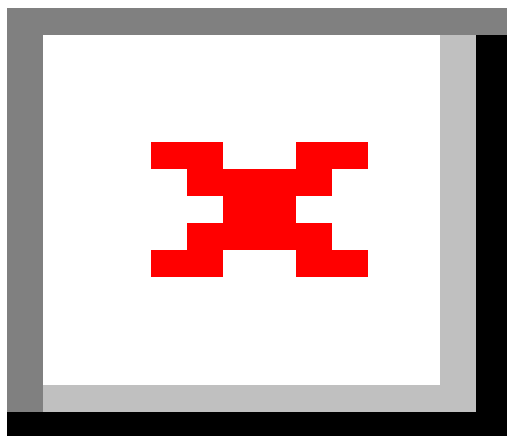

**Fig. S2.** The experimental X-band single crystal EPR spectra multiplied by temperature for the single crystal of **1**.
